# Diabetes and Coronary Risk Equivalency

## What does it mean?

The National Cholesterol Education Program Adult Treatment Panel III (ATP III) listed diabetes as a coronary heart disease (CHD) risk equivalent for setting therapeutic goals for LDL cholesterol (1). A goal for LDL cholesterol of <100 mg/dl was recommended for patients with CHD and CHD risk equivalents. The latter included individuals with noncoronary forms of atherosclerotic cardiovascular disease (ASCVD), diabetes, and patients with a 10-year risk for major coronary events (myocardial infarction + coronary death) of >20%. For the majority of patients with diabetes, this LDL cholesterol goal would evoke the use of cholesterol-lowering drugs, particularly statins. Some investigators have questioned whether most or all patients with diabetes have a CHD risk equivalent and thus require cholesterol-lowering drugs (2). One approach to this issue is to examine epidemiological data relating to absolute risk for developing CHD in various populations of persons with diabetes.

In the present issue of *Diabetes Care*, Howard et al. (3) reported the incidence of CHD in the Strong Heart Study, a cohort study of cardiovascular disease (CVD) in 13 American-Indian tribes/communities conducted in three study centers in southwestern Oklahoma, central Arizona, and North and South Dakota. The population of the Strong Heart Study has a high prevalence of type 2 diabetes and CVD associated with diabetes. The findings of this study showed wide variation in rates of CHD in patients with diabetes, depending in part on coexisting risk factors. Most individuals had 10-year risk >20%, the threshold for ATP III's CHD risk equivalency, but only those with multiple risk factors had rates of CHD events equivalent to patients with established CHD. The authors conclude that it may be prudent to consider therapeutic goals for risk factors based on the entire risk factor profile, rather than just the presence of diabetes.

Other studies likewise have found considerable variability in risk for major coronary events when diabetes is present. Some reports (4–10) suggest that patients

who have diabetes but not CHD do not carry as high a risk for major coronary events as do those with established CHD. Other studies (11–14) find that risk for CHD is similar in patients with diabetes and those with established CHD. The ATP III report (1) indicated that diabetes in general can be viewed as a high-risk state (CHD risk equivalent); this is generally true and adds simplicity to cholesterol management, just as it does for patients with established ASCVD. An alternate approach is to attempt to estimate 10-year risk for individuals with diabetes and to adjust LDL cholesterol goals accordingly. An example of individualized risk assessment is the U.K. Prospective Diabetes Study risk engine (15), which calculates risk for individuals with diabetes analogous to the risk algorithm of the Framingham Heart Study (8). Of interest, several reports suggest that Framingham scoring for patients with diabetes often underestimates absolute risk (16–18). If so, the choice of the risk assessment tool for estimating risk for CHD becomes an important issue when using an individualized approach.

Of course, there is variability in risk for major coronary events in patients with established CHD; therefore risk assessment could be carried out in individuals with CHD to tailor secondary prevention therapies. This approach however has been widely rejected by guideline panels for CHD prevention (1,19–21). For most cardiovascular guidelines, a diagnosis of ASCVD triggers a full therapeutic response for secondary prevention. The rationale is that the clinical simplicity of this approach will yield a net benefit that exceeds individual risk assessment based on problematic risk-assessment tools. This simplified strategy has been widely accepted by the cardiovascular community and appears to have improved implementation of secondary prevention therapies.

The National Cholesterol Education Program (1) proposed the same approach for patients with diabetes who as a group are known to be at high risk for ASCVD events. The concept is that most patients with diabetes in the U.S. are at least a

high enough risk that a simple tactic for cholesterol-lowering therapy will be both efficacious and cost-effective. Even though an individualized risk assessment in patients with diabetes is reasonable in the hands of specialists, a broad application of risk assessment and adjustment of goals for LDL cholesterol on a patient-by-patient basis by most practitioners will be difficult to implement, just as it would be in management of patients with ASCVD. Moreover, beyond the simplicity of guidelines, several other reasons were given in the ATP III report for identifying patients with diabetes as having a CHD risk equivalent. These reasons can be summarized briefly.

First, in ATP III, CHD risk equivalent defines the risk of developing a major coronary event (myocardial infarction + coronary death) over 10 years of >20%. The 20% risk was that of patients with stable angina who have not sustained a myocardial infarction (22,23). This risk is lower than for those who have a history of acute myocardial infarction, which is about 26% (24,25). Many subsequently assumed that the risk accompanying a history of myocardial infarction defined a CHD risk equivalent and not stable angina. This was not the position of ATP III (1), which identified the 20% level. Moreover, cost-effectiveness analysis showed that cholesterol-lowering drugs are highly cost-effective at the risk level of 20% (1). In fact, as the costs of cholesterol-lowering drugs decline, acceptable cost-effectiveness reaches down to 10% risk or even lower (1).

Beyond 10-year risk estimates, there were other reasons for applying the term of CHD risk equivalent to patients with diabetes. A common misconception is that this term came exclusively from the study of Haffner et al. (11), which reported that Finnish patients with type 2 diabetes have a risk for future major coronary events similar to that of patients with previous myocardial infarction. In ATP III, this was not the only rationale, although reference was made to this report (11) and others with similar findings

(12,13). But other reports showed that coronary mortality at time of acute myocardial infarction is essentially doubled in patients with diabetes compared with those without diabetes (26,27). Moreover, in survivors of myocardial infarction, follow-up mortality in patients with diabetes is essentially doubled compared with persons without diabetes (28–34). ATP III contends that this high risk following onset of CHD justifies more intensive primary prevention of ASCVD in individuals with diabetes even if their 10-year risk is in the range somewhat below 20%. Other reasons can be cited for elevating the risk category when diabetes is present. For instance, patients with diabetes live on a higher trajectory of long-term risk than those without the disorder (35–37). Several robust clinical trials, moreover, some of which were available at time of the ATP III report (1), have documented benefit of statin therapy in patients with diabetes (38–41). These trials have reassured many clinicians that more intensive cholesterol-lowering therapy is warranted when diabetes is present.

Recently, Alexander et al. (42) reported from the National Health and Nutrition Examination Survey (NHANES) III that persons with diabetes who have concomitant metabolic syndrome, as defined by ATP III, are the ones who are at highest risk. In fact, in patients without metabolic syndrome, diabetes conferred very little increased risk for major coronary events. In NHANES, ~86% of patients with type 2 diabetes over age 50 years had metabolic syndrome (43). The findings of Howard et al. (3) are consistent with the NHANES III findings; patients with multiple metabolic risk factors were those at highest risk. In other words, hyperglycemia in the absence of other risk factors did not impart much increased risk for CVD over the short term. This particularly is the case for plasma glucose elevations in the range of pre-diabetes independent of other risk factors (43,44). Of course, pre-diabetes carries a higher risk for type 2 diabetes, which in itself is accompanied by many complications other than CVD. Thus, for those who are uncomfortable with the generalized approach recommended by ATP III, an alternative strategy at least would be to count diabetes together with metabolic syndrome as a high-risk condition worthy of intensive cholesterol-lowering therapy. Whether type 2 diabetes without the metabolic syndrome in fact carries a higher long-term risk for CVD remains to be deter-

mined. By the same token, how to approach cholesterol-lowering therapy in patients with type 1 diabetes in its earlier stages is open to question (42). Most investigators do not favor use of cholesterol-lowering drugs in early years of type 1 diabetes, but as age advances, if LDL cholesterol levels rise or if metabolic syndrome becomes evident, cholesterol-lowering drugs become a reasonable option.

The recent update of ATP III (45) introduced the term high-risk to encompass ATP III's CHD and CHD risk equivalent category. This term may be less contentious and more generic. There appears to be increasing acceptance of the concept that most patients with diabetes are at high risk for ASCVD and that cholesterol-lowering therapy is an important component of risk reduction in this risk category. Acceptance of this term may dampen some of the dispute as to whether diabetes is a CHD risk equivalent.

SCOTT M. GRUNDY, MD, PHD

From the Center for Human Nutrition and Departments of Clinical Nutrition and Internal Medicine, University of Texas Southwestern Medical Center at Dallas, Dallas, Texas.

Address correspondence to Dr. Scott M. Grundy, Center for Human Nutrition and Departments of Clinical Nutrition and Internal Medicine, University of Texas Southwestern Medical Center at Dallas, 5323 Harry Hines Boulevard, Y3.206, Dallas, TX 75390-9052. E-mail: scott.grundy@utsouthwestern.edu.

© 2006 by the American Diabetes Association.

## References

- National Cholesterol Education Program (NCEP) Expert Panel on Detection, Evaluation, and Treatment of High Blood Cholesterol in Adults (Adult Treatment Panel III): Third Report of the National Cholesterol Education Program (NCEP) Expert Panel on Detection, Evaluation, and Treatment of High Blood Cholesterol in Adults (Adult Treatment Panel III) final report. *Circulation* 106:3143–3421, 2002
- Garg A: Statins for all patients with type 2 diabetes: not so soon. *Lancet* 364:641–642, 2004
- Howard BV, Best LG, Galloway JM, Howard WJ, Jones K, Lee ET, Ratner RE, Resnick HE, Devereux RB: Coronary heart disease risk equivalence in diabetes depends on concomitant risk factors. *Diabetes Care* 29:391–397, 2006
- Evans JM, Wang J, Morris AD: Comparison of cardiovascular risk between patients with type 2 diabetes and those who had had a myocardial infarction: cross

sectional and cohort studies. *BMJ* 324:939–942, 2002

- Lottufo PA, Gaziano JM, Chae CU, Ajani UA, Moreno-John G, Buring JE: Diabetes and all cause and coronary heart disease mortality among US male physicians. *Arch Intern Med* 161:242–247, 2001
- Hu FB, Stampfer MJ, Solomon CG, Liu S, Willett WC, Speizer FE: The impact of diabetes mellitus on mortality from all causes and coronary heart disease in women: 20 years of follow up. *Arch Intern Med* 161:1717–1723, 2001
- Eberly LE, Cohen JD, Prineas R, Yang L: Impact of incident diabetes and incident non fatal cardiovascular disease on 18 year mortality: the Multiple Risk Factor Intervention Trial experience. *Diabetes Care* 26:848–854, 2003
- Wilson PWF, D'Agostino RB, Levy D, Belanger AM, Silbershatz H, Kannel WB: Prediction of coronary heart disease using risk factor categories. *Circulation* 197:1837–1847, 1998
- Cullen P, von Eckardstein A, Assmann G: Diagnosis and management of new cardiovascular risk factors. *Eur Heart J* 19 (Suppl. O):O13–O19, 1998
- UK Prospective Diabetes Study Group: Tight blood pressure control and risk of macrovascular and microvascular complications in type 2 diabetes: UKPDS 38. *BMJ* 317:703–713, 1998
- Haffner SM, Lehto S, Rönkämaa T, Pyörälä K, Laakso M: Mortality from coronary heart disease in subjects with type 2 diabetes and in nondiabetic subjects with and without prior myocardial infarction. *N Engl J Med* 339:229–234, 1998
- Malmberg K, Yusuf S, Gerstein HC, Brown J, Zhao F, Hunt D, Piegas L, Calvin J, Keltai M, Budaj A, the OASIS Registry Investigators: Impact of diabetes on long-term prognosis in patients with unstable angina and non-Q-wave myocardial infarction: results of the OASIS (Organization to Assess Strategies for Ischemic Syndromes) Registry. *Circulation* 102:1014–1019, 2000
- Heart Outcomes Prevention Evaluation Study Investigators: Effects of an angiotensin-converting-enzyme inhibitor, ramipril, on cardiovascular events in high-risk patients. *N Engl J Med* 342:145–153, 2000
- Whiteley L, Padmanabhan S, Hole D, Isles C: Should diabetes be considered a coronary heart disease risk equivalent? Results from 25 years of follow-up in the Renfrew and Paisley Survey. *Diabetes Care* 28:1588–1593, 2005
- Stevens R, Kothari V, Adler A, Stratton IM, Holman RR: UKPDS 56: the UKPDS Risk Engine: a model for the risk of coronary heart disease in type 2 diabetes. *Clinical Sci (Lond)* 101:671–679, 2001
- Yeo WW, Rowland Yeo K: Predicting CHD risk in patients with diabetes mellitus. *Diabet Med* 18:341344, 2001

17. McEwan P, Williams JE, Griffiths JD, Bagust A, Peters JR, Hopkinson P, Currie CJ: Evaluating the performance of the Framingham risk equations in a population with diabetes. *Diabet Med* 21:318323, 2004
18. Stevens RJ, Coleman RL, Holman RR: Framingham risk equations underestimate coronary heart disease risk in diabetes. *Diabet Med* 22:228–228, 2005
19. Smith SC Jr, Blair SN, Bonow RO, Brass LM, Cerqueira MD, Dracup K, Fuster V, Gotto A, Grundy SM, Miller NH, Jacobs A, Jones D, Krauss RM, Mosca L, Ockene I, Pasternak RC, Pearson T, Pfeffer MA, Starke RD, Taubert KA: AHA/ACC Scientific Statement: AHA/ACC guidelines for preventing heart attack and death in patients with atherosclerotic cardiovascular disease: 2001 update: a statement for healthcare professionals from the American Heart Association and the American College of Cardiology. *Circulation* 104:1577–1579, 2001
20. DeBacker G, Ambrosini E, Borch-Johnsen K, Brotons C, Cifkova R, Dallongeville J, Ebrahim S, Faergeman O, Graham I, Marcia G, Manger Cats V, Orth-Gomer K, Perk J, Pyorala K, Rodicio JL, Sans S, Sanzoy V, Sechtem U, Silber S, Thomsen T, Wood D, Third Joint Task Force of European and Other Societies on Cardiovascular Disease Prevention in Clinical Practice: European guidelines on cardiovascular disease prevention in clinical practice: the third joint task force of European and other societies on cardiovascular disease prevention in clinical practice: executive summary. *Eur Heart J* 24:1601–1610, 2003
21. Smith SC Jr, Jackson R, Pearson TA, Fuster V, Yusuf S, Faergeman O, Wood DA, Alderman M, Horgan J, Home P, Hunn M, Grundy SM: Principles for national and regional guidelines on cardiovascular disease prevention: a scientific statement from the World Heart and Stroke Forum. *Circulation* 109:3112–3121, 2004
22. Cleland JG: Can improved quality of care reduce the costs of managing angina pectoris? *Eur Heart J* 17:A29–A40, 1996
23. Juul-Moller S, Edvardsson N, Jahnmatz B, Rosen A, Sorensen S, Omblus R, the Swedish Angina Pectoris Aspirin Trial (SAPAT) Group: Double-blind trial of aspirin in primary prevention of myocardial infarction in patients with stable chronic angina pectoris. *Lancet* 340:1421–1425, 1992
24. Sacks FM, Pfeffer MA, Moya LA, Rouleau JL, Rutherford JD, Cole TD, Brown L, Warnica JW, Arnold JMO, Wun C-C, Davis BR, Braunwald E, the Cholesterol and Recurrent Events Trial Investigators: The effect of pravastatin on coronary events after myocardial infarction in patients with average cholesterol levels. *N Engl J Med* 335:1001–1009, 1996
25. The Long-Term Intervention with Pravastatin in Ischaemic Disease (LIPID) Study Group: Prevention of cardiovascular events and death with pravastatin in patients with coronary heart disease and a broad range of initial cholesterol levels. *N Engl J Med* 339:1349–1357, 1998
26. Herlitz J, Karlson BW, Edrardsson N, Emanuelsson H, Hjalmarson A: Prognosis in diabetics with chest pain or other symptoms suggestive of acute myocardial infarction. *Cardiology* 80:237–245, 1992
27. Miettinen H, Lehto S, Salomaa V, Mähönen M, Niemelä M, Haffner SM, Pyörälä K, Tuomilehto J, the FINMONICA Myocardial Infarction Register Study Group: Impact of diabetes on mortality after the first myocardial infarction. *Diabetes Care* 21:69–75, 1998
28. Behar S, Boyko V, Reicher-Reiss H, Goldbourt U, the Sprint Study Group: Ten-year survival after acute myocardial infarction: comparison of patients with and without diabetes. *Am Heart J* 133:290–296, 1997
29. Benderly M, Behar S, Reicher-Reiss H, Boyko V, Goldbourt U, the Sprint Study Group: Long-term prognosis of women after myocardial infarction. *Am J Epidemiol* 146:153–160, 1997
30. Karlson BW, Wiklund O, Hallgren P, Sjölin M, Lindqvist J, Herlitz J: Ten-year mortality amongst patients with a very small or unconfirmed acute myocardial infarction in relation to clinical history, metabolic screening and signs of myocardial ischaemia. *J Intern Med* 247:449–456, 2000
31. Gustafsson I, Hildebrandt P, Seibaek M, Melchior T, Torp-Pedersen C, Kober L, Kaiser-Nielsen P, the TRACE Study Group: Long-term prognosis of diabetic patients with myocardial infarction: relation to antidiabetic treatment regimen. *Eur Heart J* 21:1937–1943, 2000
32. Thourani VH, Weintraub WS, Stein B, Gebhart SSP, Craver JM, Jones EL, Guyton RA: Influence of diabetes mellitus on early and late outcome after coronary artery bypass grafting. *Ann Thorac Surg* 67:1045–1052, 1999
33. Herlitz J, Wognsen GB, Karlson BW, Sjöland H, Karlsson T, Caidahl K, Hartford M, Haglid M: Mortality, mode of death and risk indicators for death during 5 years after coronary artery bypass grafting among patients with and without a history of diabetes mellitus. *Coron Artery Dis* 11:339–346, 2000
34. Meier JJ, Deifuss S, Klamann A, Schmiegel W, Nauck MA: Influence of an antidiabetic treatment with sulfonylurea drugs on long-term survival after acute myocardial infarction in patients with type 2 diabetes: the LAngen dreer Myocardial infarction and Blood glucose in Diabetic patients Assessment (LAMBDA). *Exp Clin Endocrinol Diabetes* 111:344–350, 2003
35. Adlerberth AM, Rosengren A, Wilhelmsson L: Diabetes and long-term risk of mortality from coronary and other causes in middle-aged Swedish men: a general population study. *Diabetes Care* 21:539–545, 1998
36. Cho E, Rimm EB, Stampfer MJ, Willett WC, Hu FB: The impact of diabetes mellitus and prior myocardial infarction on mortality from all causes and from coronary heart disease in men. *J Am Coll Cardiol* 40:954–960, 2002
37. Fox CS, Sullivan L, D'Agostino RB Sr, Wilson PW: The significant effect of diabetes duration on coronary heart disease mortality: the Framingham Heart Study. *Diabetes Care* 27:704–708, 2004
38. Goldberg RB, Mellies MJ, Sacks FM, Moya LA, Howard BV, Howard WJ, Davis BR, Cole TG, Pfeffer MA, Braunwald E: Cardiovascular events and their reduction with pravastatin in diabetic and glucose-intolerant myocardial infarction survivors with average cholesterol levels: subgroup analyses in the Cholesterol and Recurrent Events (CARE) trial. *Circulation* 98:2513–2519, 1998
39. Haffner SM, Alexander CM, Cook TJ, Boccuzzi SJ, Musliner TA, Pedersen TR, Kjekshus J, Pyorala K: Reduced coronary events in simvastatin-treated patients with coronary heart disease and diabetes or impaired fasting glucose levels: subgroup analyses in the Scandinavian Simvastatin Survival Study. *Arch Intern Med* 159:2661–2667, 1999
40. Collins R, Armitage J, Parish S, Sleight P, Peto R, the Heart Protection Study Collaborative Group: MRC/BHF Heart Protection Study of cholesterol-lowering with simvastatin in 5963 people with diabetes: a randomised placebo-controlled trial. *Lancet* 361:2005–2016, 2003
41. Colhoun HM, Betteridge DJ, Durrington PN, Hitman GA, Neil HA, Livingstone SJ, Thomason MJ, Mackness MI, Charlton-Menys V, Fuller JH, the CARDS Investigators: Primary prevention of cardiovascular disease with atorvastatin in type 2 diabetes in the Collaborative Atorvastatin Diabetes Study (CARDS): multicentre randomised placebo-controlled trial. *Lancet* 364:685–696, 2004
42. Alexander CM, Landsman PB, Teutsch SM, Haffner SM, Third National Health and Nutrition Examination Survey (NHANES III), National Cholesterol Education Program (NCEP): NCEP-defined metabolic syndrome, diabetes, and prevalence of coronary heart disease among NHANES III participants age 50 years and older. *Diabetes* 52:1210–1214, 2003
43. Sorkin JD, Muller DC, Fleg JL, Andres R: The relation of the fasting and 2 h post-challenge plasma glucose concentrations

- to mortality: data from the Baltimore Longitudinal Study of Aging with a critical review of the literature. *Diabetes Care* 28:2626–2632, 2005
44. Wen CP, Cheng TD, Tsai SP, Hsu HL, Wang SL: Increased mortality risks of pre-diabetes (impaired fasting glucose) in Taiwan. *Diabetes Care* 28:2757–2761, 2005
45. Grundy SM, Cleeman JI, Merz CN, Brewer HB Jr, Clark LT, Hunninghake DB, Pasternak RC, Smith SC Jr, Stone NJ, National Heart, Lung, and Blood Institute, American College of Cardiology Foundation, American Heart Association: Implications of recent clinical trials for the National Cholesterol Education Program Adult Treatment Panel III guidelines. *Circulation* 110:227–239, 2004
